# Supplementary material for: Structural insights into the orthosteric inhibition of P2X receptors by non-ATP analog antagonists
Source: eLife. 2024 Apr 5;12:RP92829. doi: 10.7554/eLife.92829 (PMC10997329; doi:10.7554/eLife.92829)
Supplement: Figure 1—figure supplement 1—source data 1. [file elife-92829-fig1-figsupp1-data1.xlsx]

## Sheet: Fig1-Sup1C
	ATP	PPNDS		Inhibition Ratio
	(pA)	(pA)
PdP2X7-WT-PPNDS	4500	2760		0.386667
	3120	1416		0.546154
	4650	2400		0.483871
	1377	660		0.520697
	3764	2642		0.298087
		The same data for PdP2X7-WT-PPNDS is shown in Figure 6B.

## Sheet: Fig1-Sup1D
	ATP	PPADS		Inhibition Ratio
	(pA)	(pA)
PdP2X7-WT-PPADS	3681	2577		0.299919
	4284	1752		0.591036
	6287	3772		0.400032
	1038	322		0.689788
	2463	941		0.617946
