# Supplementary material for: Structural insights into the orthosteric inhibition of P2X receptors by non-ATP analog antagonists
Source: eLife. 2024 Apr 5;12:RP92829. doi: 10.7554/eLife.92829 (PMC10997329; doi:10.7554/eLife.92829)
Supplement: Figure 6—source data 1. [file elife-92829-fig6-data1.xlsx]

## Sheet: Fig6B
	ATP	PPNDS		Inhibition Ratio
	(pA)	(pA)
PdP2X7-WT-PPNDS	4500	2760		0.386667
	3120	1416		0.546154
	4650	2400		0.483871
	1377	660		0.520697
	3764	2642		0.298087
	The same data for PdP2X7-WT-PPNDS is shown in Figure 1–figure supplement 1C.
PdP2X7-Q143A-PPNDS	7040	5030		0.285511
	1140	656		0.424561
	1925	1420		0.262338
	3284	2495		0.240256
	6052	4424		0.269002
PdP2X7-Q143K-PPNDS	712	195		0.726124
	5255	494		0.905994
	5100	1960		0.615686
	8026	2280		0.715923
	8290	1550		0.813028
PdP2X7-V173D-PPNDS	3100	2400		0.225806
	5441	5190		0.0461312
	4503	3368		0.252054
	4350	3150		0.275862
	4293	4050		0.0566038
PdP2X7-I214K-PPNDS	5236	212		0.959511
	9000	1400		0.844444
	2800	120		0.957143
	5289	100		0.981093
	9412	660		0.929877
PdP2X7-Q248A-PPNDS	1604	900		0.438903
	3204	2330		0.272784
	4999	2370		0.525905
	6808	5827		0.144095
	3373	2868		0.149718
PdP2X7-Q248K-PPNDS	7860	3204		0.592366
	4200	800		0.809524
	9395	5019		0.46578
	3806	1794		0.528639
	8600	1650		0.80814
PdP2X7-Y288A-PPNDS	3869	1395		0.639442
	652	90		0.861963
	2658	1005		0.621896
	2770	390		0.859206
	5267	1250		0.762673
PdP2X7-Y288S-PPNDS	3137	2166		0.309531
	2046	1300		0.364614
	2378	2020		0.150547
	5800	3106		0.464483
	3438	2050		0.403723

## Sheet: Fig6C
	ATP	PPNDS		Inhibition Ratio
	(pA)	(pA)
hP2X1-WT-PPNDS	2000	1100		0.45
	3107	1625		0.476987
	2591	888		0.657275
	2221	1313		0.408825
	2100	1081		0.485238
	900	549		0.39
	4000	2284		0.429
	1000	489		0.511
	1000	600		0.4
	3900	2223		0.43
hP2X1-K140A-PPNDS	380	350		0.0789474
	598	450		0.247492
	1606	1600		0.00373599
	1436	1026		0.285515
	1150	960		0.165217
	2000	2000		0
	2471	2314		0.063537
	1195	1064		0.109623
hP2X1-D170A-PPNDS	1653	430		0.739867
	1886	622		0.670201
	934	402		0.569593
	1000	200		0.8
	400	100		0.75
hP2X1-K215A-PPNDS	1300	1180		0.0923077
	2200	1550		0.295455
	2323	1900		0.182092
	800	770		0.0375
	1364	1200		0.120235
	2700	2400		0.111111
	2500	1700		0.32
hP2X1-K249A-PPNDS	1267	950		0.250197
	394	300		0.238579
	1867	1400		0.250134
	2222	1400		0.369937
	2000	1600		0.2
	4000	2800		0.3
	1015	650		0.359606
hP2X1-S286A-PPNDS	900	90		0.9
	2173	500		0.769903
	2096	650		0.689885
	2631	500		0.809958
	2400	600		0.75

## Sheet: Fig6D
	ATP	PPNDS		Inhibition Ratio
	(pA)	(pA)
hP2X3-WT-PPNDS	1485	400		0.73064
	1185	400		0.662447
	1637	400		0.755651
	2296	1000		0.56446
	1400	478		0.658571
hP2X3-K201A-PPNDS	1429	1100		0.230231
	1997	1600		0.198798
	645	400		0.379845
	1125	900		0.2
	1400	1000		0.285714
